# Supplementary material for: The SARS-CoV-2 spike protein structure: a symmetry tale on distortion trail
Source: Royal Society of Chemistry journal article supplement (doi:10.1039/d3cp00163f), 2023-01-01
Supplement: d3cp00163f1.pdf [file d3cp00163f1.pdf]

## Electronic Supplementary Information

### The SARS-CoV-2 Spike Protein Structure: A Symmetry Tale on Distortion Trail

Inbal Tuvi-Arad\* and Yaffa Shalit

Department of Natural Sciences, The Open University of Israel, Raanana, Israel

---

| <b>Content</b>                                                                                                                               | <b>Page</b> |
|----------------------------------------------------------------------------------------------------------------------------------------------|-------------|
| Table S1. Domains of the SARS-CoV-2 spike protein                                                                                            | S2          |
| Table S2. Number of proteins in our dataset of spike proteins                                                                                | S2          |
| Table S3. PDB-Ids of proteins in our dataset                                                                                                 | S2          |
| Figure S1. CCM Correlation plots for the 1-Up conformer of the Omicron variant                                                               | S3          |
| Figure S2. Box and whisker plots of Pearson correlation factors for residues CCM between chains of the RBD, calculated at the backbone level | S4          |
| Figure S3. Box and whisker plots of secondary structure preservation between chains of the RBD                                               | S4          |
| Figure S4. Distortion with respect to $C_3$ symmetry at the backbone level for two Omicron variants                                          | S5          |
| Figure S5. CSM spectra for 33 SARS-CoV-2 spike protein at the backbone level                                                                 | S5          |
| Table S4. Mutations of the SARS-CoV-2 spike protein at the RBD                                                                               | S6          |

---

**Table S1.** Domains of the SARS-CoV-2 spike protein.

| Subunit | Domain | Residues Number |
|---------|--------|-----------------|
| S1      | NTD    | ≤ 293           |
|         | N2R    | 294-330         |
|         | RBD*   | 331-527         |
|         | SD1    | 528-590         |
|         | SD2    | 591-685         |
| S2      |        | ≥ 686           |

The boundaries of the domains, and especially the RBD, vary by few residues in different papers. We followed Gobeil et al. (*Molecular Cell*, 82(11), 2050-2068.e6, 2022) and defined the RBD between P330 and P527. It should be noted that a mismatch of several residues in the boundaries of each domain has a minor effect on the CSM analysis.

**Table S2.** Number of proteins in our dataset of spike proteins, by state and variant.

| Variant      | State     |           |           |
|--------------|-----------|-----------|-----------|
|              | 3-Down    | 1-Up      | Total     |
| Alpha        | 3         | 3         | 6         |
| Beta         | 1         | 5         | 6         |
| Delta        | 7         | 5         | 12        |
| Omicron      | 2         | 4         | 6         |
| WT           | 2         | 1         | 4         |
| <b>Total</b> | <b>15</b> | <b>18</b> | <b>33</b> |

**Table S3.** PDB-Ids of proteins in our dataset.

| Variant      | 3-Down                                      | 1-Up                            | Total     |
|--------------|---------------------------------------------|---------------------------------|-----------|
| Alpha        | 7LWS, 7OD3, 7ODL                            | 7EDF, 7FET, 7LWV                | 6         |
| Beta         | 7LYM                                        | 7LYN, 7LYO, 7LYP, 7V76,<br>7VX1 | 6         |
| Delta        | 7SBK, 7TOU, 7TOX, 7TOY,<br>7TP0, 7TP1, 7TP2 | 7V70, 7V7P, 7V7Q, 7V7R,<br>7W92 | 12        |
| Omicron      | 7TF8, 7WK2                                  | 7QO7, 7TGW, 7TO4, 7WVN          | 6         |
| WT           | 6ZB4, 7FCE                                  | 6Z97                            | 4         |
| <b>Total</b> | <b>15</b>                                   | <b>18</b>                       | <b>33</b> |

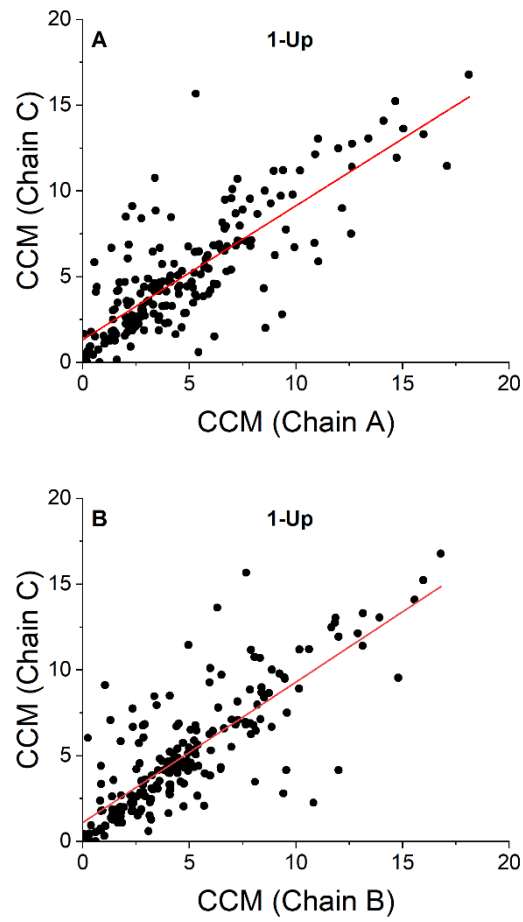

**Figure S1.** Correlation plots for the CCM per residue of the 1-Up conformer of the Omicron variant along the RBD. **A.** Correlation between chains A and C. **B.** Correlation between chains B and C. Red lines represent the regression lines. PDB-ID = 7TO4.

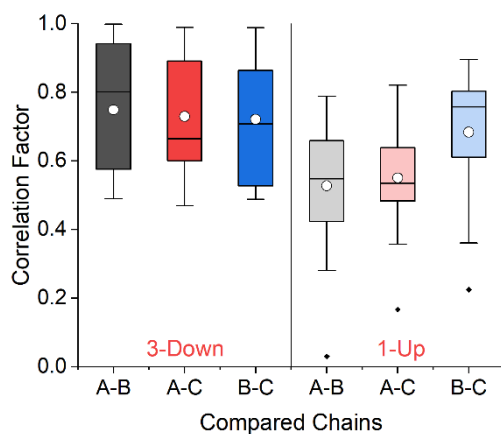

**Figure S2.** Box and whisker plots of Pearson correlation factors for residues CCM between chains of the RBD, calculated at the backbone level. The 3-Down and 1-Up states are represented by 15 and 18 proteins respectively. Box boundaries represent 25-75% of the data, horizontal line within the box is the median, and the white circle is the mean value in each box.

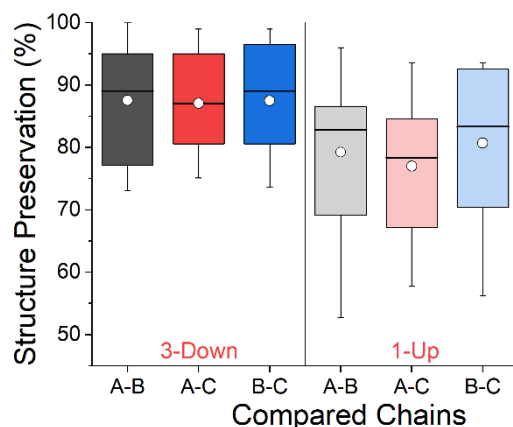

**Figure S3.** Box and whisker plots of secondary structure preservation between chains of the RBD. The 3-Down and 1-Up states are represented by 15 and 18 proteins respectively. Structure preservation for each two chains was based on comparing the secondary structure of each pair of residues, as determined by DSSP (<https://swift.cmbi.umcn.nl/gv/dssp/>). Numbers on the vertical axes represent the percentages of pairs with the same secondary structure. Box boundaries represent 25-75% of the data, horizontal line within the box is the median, and the white circle is the mean value in each box.

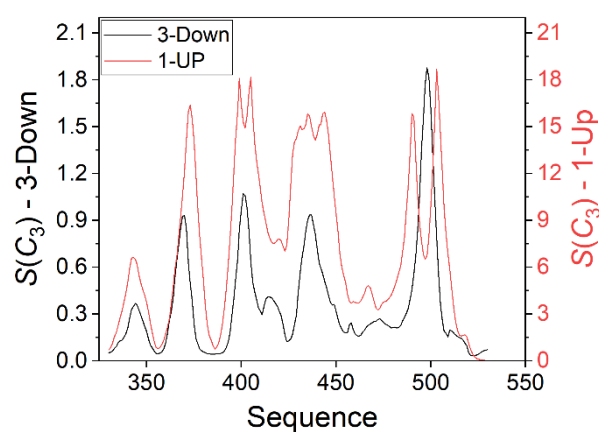

**Figure S4.** Distortion with respect to  $C_3$  symmetry of 10-residues fragments (only backbone atoms included) along the sequence of the RBD domain of the Omicron BA.1 variant of the SARS-CoV-2 spike protein. Black: 3-Down state, left Y scale (PDB-ID: 7TF8). Red: 1-Up state, right Y scale (PDB-ID: 7TO4).

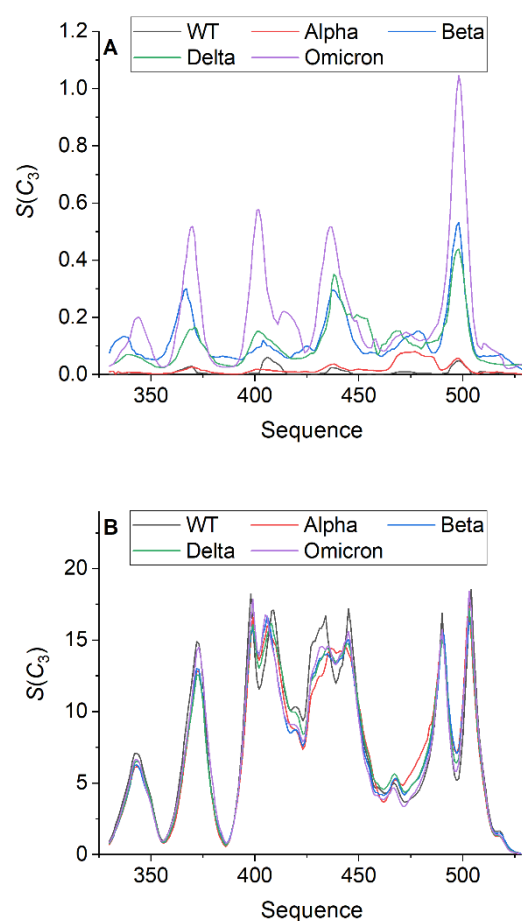

**Figure S5.** CSM spectra of 10-residues fragments along the sequence of the RBD for 33 SARS-CoV-2 spike protein at the backbone level, averaged by variant. **A.** 3-Down state. **B.** 1-Up state. PDB-Ids are listed in Table S2.

**Table S4.** Mutations of the SARS-CoV-2 spike protein at the RBD.

Source: <https://www.who.int/activities/tracking-SARS-CoV-2-variants>.

| Alpha | Beta  | Delta | Omicron BA.1 |
|-------|-------|-------|--------------|
|       |       |       | G339D        |
|       |       |       | S371F        |
|       |       |       | S373P        |
|       |       |       | S375F        |
|       | K417N |       | K417N        |
|       |       |       | N440K        |
|       |       |       | G446S        |
|       |       | L452R |              |
|       |       |       | S477N        |
|       |       | T478K | T478K        |
|       | E484K |       | E484A        |
|       |       |       | Q493R        |
|       |       |       | Q496S        |
|       |       |       | Q498R        |
| N501Y | N501Y |       | N501Y        |
|       |       |       | Y505H        |
